# Supplementary material for: Clot formation, structure, and fibrinolysis of pancreatic cancer patients
Source: Research Square preprint supplement (doi:10.21203/rs.3.rs-5868575/v1), 2025-02-11
Supplement: Supplementary file 1 [file cc612283d3389cf2bbd907f3.docx]

**SUPPLEMENT**

1. Activation of clotting with TF (rather than phospholipids)

In the main text we used phospholipids and calcium chloride to initiate clotting; however, TF (1 pM) can also be used to initiate clotting. We show that there is a correlation between an increase in max OD for both TF and phospholipids (Supplemental Figure 1a, p=0.0001), but phospholipids were able to generate clots with an overall higher max OD (Supplemental Figure 1b). There was not a correlation between the two activators for lag time (Supplemental Figure 1c, ns). It took much longer to initiate clotting with phospholipids compared to TF (Supplemental Figure 1d). There was neither a correlation nor a difference in time to 50% between the two activators (Supplemental Figure 1e, ns, f, ns).

*Supplemental Figure 1. Clotting and fibrinolysis with TF activation. Comparison of max OD (a, b), clotting lag time (c, d), and time to 50% lysis (e, f). **** p<0.0001.*

1. Comparisons between time to 50% lysis, degradation rate, and lag time.

The more time it took to break down (delayed time to 50% lysis), the slower it was degrading (slower degradation rate) (Supplemental Figure 2a, p<0.0001). There was a correlation between clotting lag time and time to 50% lysis as well as degradation for PC patients, but not healthy donors. The delayed and slower fibrinolysis were patients that had delayed initiation of clotting (Supplemental Figure 2b, c, p<0.05). PTT correlated to time to 50% lysis (Supplemental Figure 2d, p<0.05).

*Supplemental Figure 2. Role of degradation. Comparison between a) time to 50% lysis and degradation rate, b) clotting lag time and time to 50% lysis, and d) clotting lag time and degradation rate. d) Comparison between PTT and time to 50% lysis. Pink was PC, black was healthy donor.*

1. Clot structure and clotting kinetics

For PC patients, fibrin network pore size does not correlate to rate of formation, time to 50% lysis or max OD (Supplemental Figure 3a-c, ns). Type of anticoagulant does not alter pore size (Supplementary Figure 3d). An increase in fiber diameter correlated to a higher maximum optical density (Supplemental Figure 3d, p<0.01), but not the rate of formation (Supplemental Figure 3f, ns). Diameter does not correlate to time to 50% lysis (Supplemental Figure 3g, ns). A longer PTT correlates to a thicker fiber diameter (Supplemental Figure 3h, p<0.05).

*Supplemental Figure 3. Fibrin network structure relationships. Relationship between fibrin network pore size and a) rate of formation, b) time to 50% lysis, c) max OD, and d) anticoagulants. Relationship between fiber diameter and e) rate of formation, f) max OD, g) time to 50% lysis, and h) PTT. Pink was PC, black was healthy donor.*

1. Comparisons with factor levels.

Neither thrombin generation nor fibrinogen concentration correlated to clotting lag time (Supplemental Figure 4a, ns, b, ns). An increased fibrinogen concentration correlated to a decreased hematocrit, increased max OD, and increased fiber diameter (Supplemental Figure 4c, p<0.05, d, p<0.0001, e, p<0.05). Neither thrombin generation nor fibrinogen concentration correlated to time to 50% lysis (Supplemental Figure 4f, ns, g, ns). An increased concentration of PAI-1 correlated to a delayed time to 50% lysis and a delayed partial thrombin time (PTT) (Supplemental Figure 4h, p<0.01, i, p<0.05). There was not a correlation between TAFI and time to 50% lysis (Supplemental Figure 4j, ns).

*Supplemental Figure 4. Relationships with clotting and fibrinolytic factors. a) Relationship between thrombin generation and clotting lag time. Relationships between fibrinogen concentration and c) clotting lag time, c) hematocrit, d) max OD, and e) diameter. Relationship between f) fibrinogen concentration and g) thrombin generation with time to 50% lysis. Relationship between PAI-1 and h) time to 50% lysis and I) PTT. j) Relationship between TAFI and time to 50% lysis. Pink was PC, black was healthy donor.*
